# Supplementary material for: Nonvolatile switchable half-metallicity and magnetism in the MXene Hf2MnC2O2/Sc2CO2 multiferroic heterostructure
Source: Royal Society of Chemistry journal article supplement (doi:10.1039/d3cp04847k), 2024-01-01
Supplement: d3cp04847k1.pdf [file d3cp04847k1.pdf]

**Supplementary Material:**

**Nonvolatile switchable half metallicity and magnetism in  
MXenes Hf<sub>2</sub>MnC<sub>2</sub>O<sub>2</sub>/Sc<sub>2</sub>CO<sub>2</sub> multiferroelectric heterostructure**

Changwei Wu,<sup>\*a,b,c</sup> Shanwei Sun,<sup>c</sup> Weiping Gong,<sup>a,b</sup> Jiangyu Li,<sup>\*d</sup> Xiao Wang<sup>\*c</sup>

<sup>a</sup>Guangdong Provincial Key Laboratory of Electronic Functional Materials and Devices, Huizhou University, Huizhou 516001, P. R. China

<sup>b</sup>School of Electronic Information and Electrical Engineering, Huizhou University, Huizhou 516001, Guangdong, P. R. China

<sup>c</sup>Shenzhen Key Laboratory of Nanobiomechanics, Shenzhen Institute of Advanced Technology, Chinese Academy of Sciences, Shenzhen 518055, P. R. China

<sup>d</sup>Guangdong Provincial Key Laboratory of Functional Oxide Materials and Devices, Department of Materials Science and Engineering, Southern University of Science and Technology, Shenzhen 518055, P. R. China

**Corresponding authors**

Changwei Wu: cw.wu@hzu.edu.cn

Jiangyu Li: lijy@sustech.edu.cn

Xiao Wang: xiaowang@siat.ac.cn

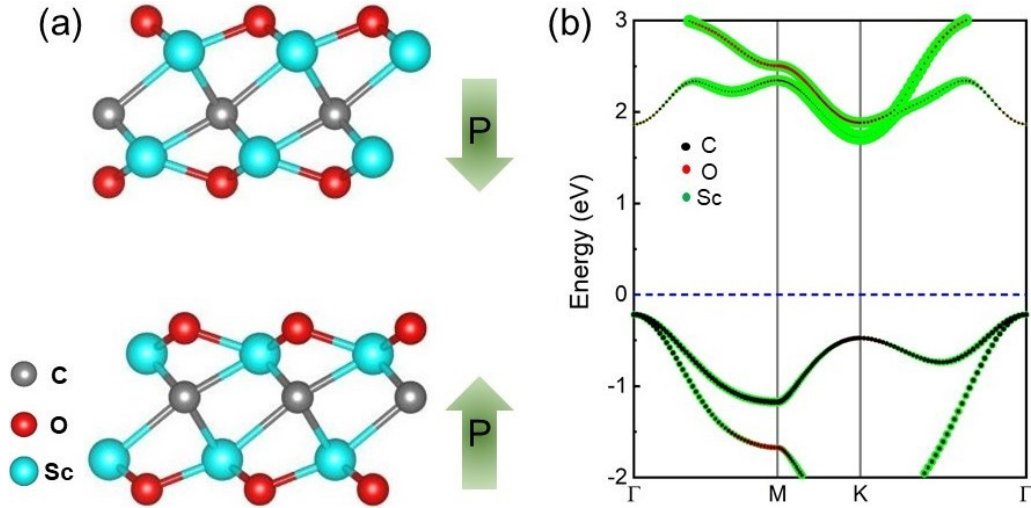

**Figure S1.** (a) The atom structural diagrams of  $\text{Sc}_2\text{CO}_2$  monolayer with different polarization orientations. (b) Band structure of  $\text{Sc}_2\text{CO}_2$  monolayer. The gray, red and cyan balls represent C, O and Sc atoms, respectively. The green arrow represents the direction of polarization.

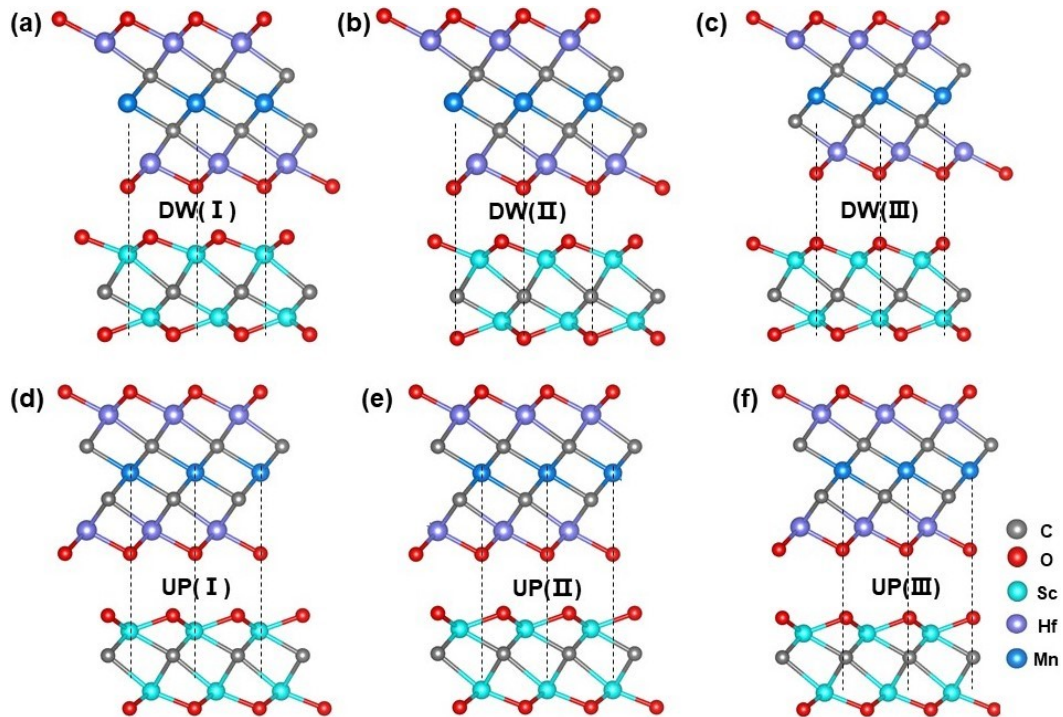

**Figure S2.** (a) The different stacking configurations of  $\text{Hf}_2\text{MnC}_2\text{O}_2/\text{Sc}_2\text{CO}_2$  heterostructures. (a) DW-(I), (b) DW-(II), (c) DW-(III) are for  $\text{Hf}_2\text{MnC}_2\text{O}_2/\text{Sc}_2\text{CO}_2\downarrow$ . (d) UP-(I), (e) UP-(II), (f) UP-(III) are for  $\text{Hf}_2\text{MnC}_2\text{O}_2/\text{Sc}_2\text{CO}_2\uparrow$ . C, O, Sc, Mn and Hf are represented by gray, red, cyan, blue and purple balls, respectively.

**Table S1.** Calculated parameters of  $\text{Hf}_2\text{MnC}_2\text{O}_7/\text{Sc}_2\text{CO}_2$  heterostructures.  $d$  is the interlayer distance.  $d_{\text{O-O}}$  is the minimum distance between O atom in  $\text{Hf}_2\text{MnC}_2\text{O}_7$  and O atom in  $\text{Sc}_2\text{CO}_2$ .  $d_{\text{O-Sc}}$  is the minimum distance between O atom in  $\text{Hf}_2\text{MnC}_2\text{O}_7$  and Sc atom in  $\text{Sc}_2\text{CO}_2$ .  $E_{\text{tot}}$  is the total energy.

| Stacking Configurations | DW-(I)   | DW-(II)  | DW-(III) | UP-(I)   | UP-(II)  | UP-(III) |
|-------------------------|----------|----------|----------|----------|----------|----------|
| $d$ (Å)                 | 2.168    | 2.763    | 3.121    | 2.156    | 2.523    | 3.011    |
| $d_{\text{O-O}}$ (Å)    | 2.839    | 3.271    | 3.121    | 2.825    | 3.139    | 3.011    |
| $d_{\text{O-Sc}}$ (Å)   | 2.815    | 3.932    | 4.294    | 2.775    | 3.698    | 4.072    |
| $E_{\text{tot}}$ (eV)   | -104.200 | -104.079 | -104.028 | -104.227 | -104.151 | -104.060 |

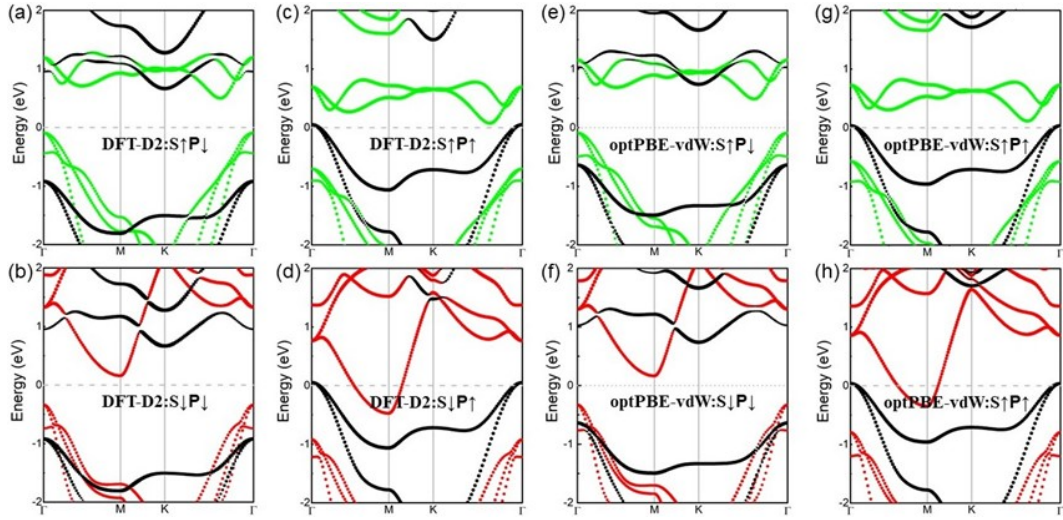

**Figure S3.** Electronic band structures of (a, b, e, f)  $\text{Hf}_2\text{MnC}_2\text{O}_7/\text{Sc}_2\text{CO}_2$   $\text{P}\downarrow$ , (c, d, g, h)  $\text{Hf}_2\text{MnC}_2\text{O}_7/\text{Sc}_2\text{CO}_2$   $\text{P}\uparrow$  with DFT-D2 and optPBE-vdW methods, respectively. Green and red lines represent the contributions from spin-up and spin-down channels of  $\text{Hf}_2\text{MnC}_2\text{O}_7$ , black lines denote the contributions from  $\text{Sc}_2\text{CO}_2$  monolayer.

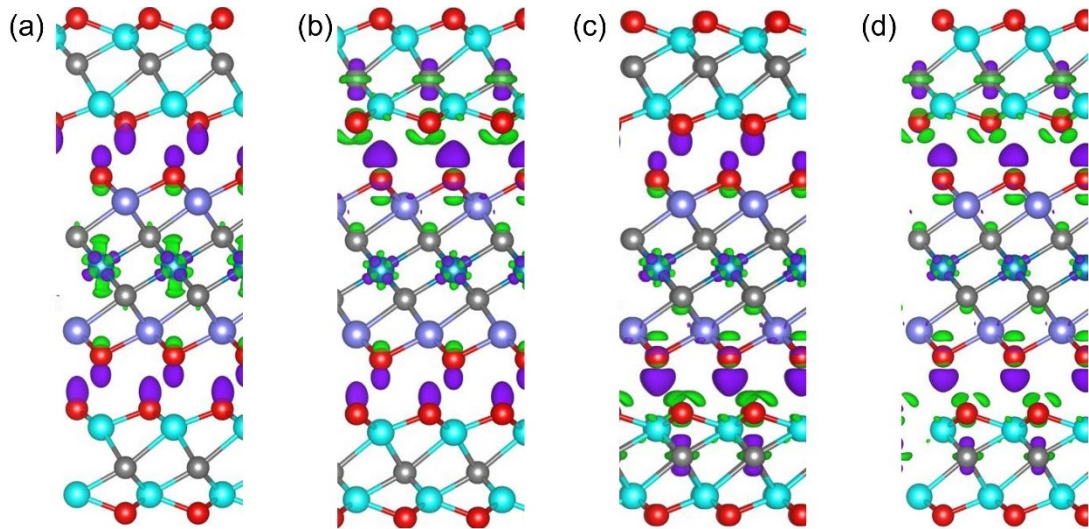

**Figure S4.** The differential charge density of four structural states (a)  $P_1$ , (b)  $(2)P_2$ , (c)  $P_3$ , and (d)  $P_4$ . The green and purple colors represent charge depletion and accumulation, respectively.

**Table S2.** The magnetic anisotropic energy ( $MAE=E_{100}-E_{001}$ ) of  $\text{Hf}_2\text{MnC}_2\text{O}_2/\text{Sc}_2\text{CO}_2$  heterostructure with different van der Waals corrections.

|                                                                      |            | $MAE=E_{100}-E_{001}$ |
|----------------------------------------------------------------------|------------|-----------------------|
| $\text{Hf}_2\text{MnC}_2\text{O}_2/\text{Sc}_2\text{CO}_2\downarrow$ | DFT-D3     | -93 $\mu\text{eV}$    |
|                                                                      | DFT-D2     | -97 $\mu\text{eV}$    |
|                                                                      | optPBE-vdw | -89 $\mu\text{eV}$    |
| $\text{Hf}_2\text{MnC}_2\text{O}_2/\text{Sc}_2\text{CO}_2\uparrow$   | DFT-D3     | 47 $\mu\text{eV}$     |
|                                                                      | DFT-D2     | 64 $\mu\text{eV}$     |
|                                                                      | optPBE-vdw | 30 $\mu\text{eV}$     |

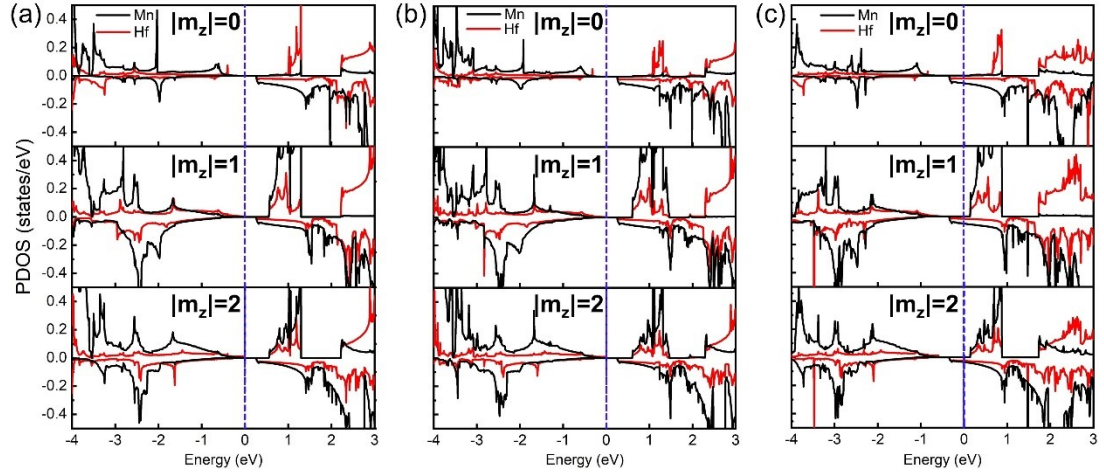

**Figure S5.** The d-orbital decomposed PDOS of (a)  $\text{Hf}_2\text{MnC}_2\text{O}_2$ , (b)  $\text{Hf}_2\text{MnC}_2\text{O}_2/\text{Sc}_2\text{CO}_2\text{-P}\downarrow$ , (c)  $\text{Hf}_2\text{MnC}_2\text{O}_2/\text{Sc}_2\text{CO}_2\text{-P}\uparrow$ . The Mn and Hf are represented by black and red colors, respectively.

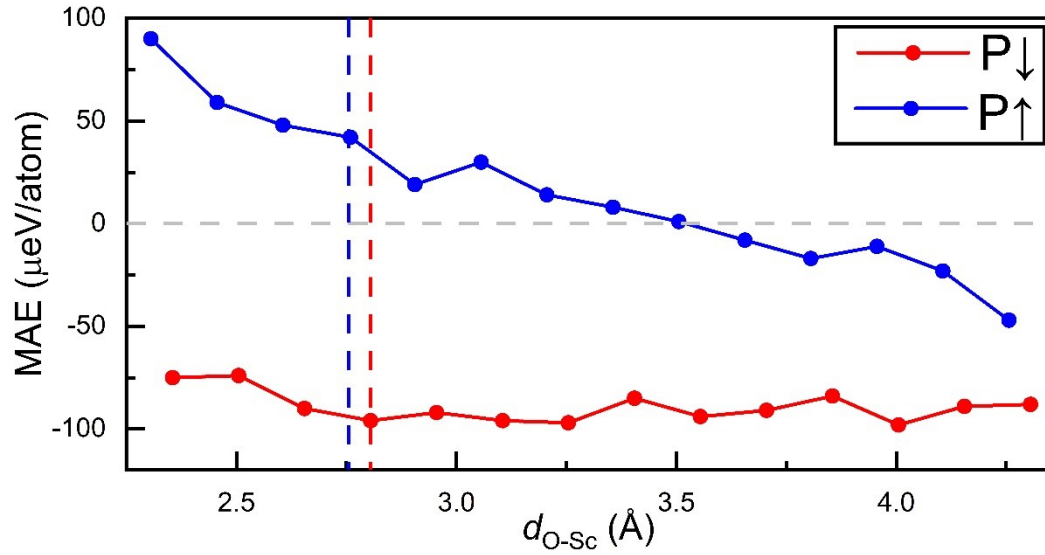

**Figure S6.** The MAE of  $\text{Hf}_2\text{MnC}_2\text{O}_2/\text{Sc}_2\text{CO}_2\text{-P}\downarrow$  (red dot line) and  $\text{Hf}_2\text{MnC}_2\text{O}_2/\text{Sc}_2\text{CO}_2\text{-P}\uparrow$  (blue dot line) as function of the  $d_{\text{O-Sc}}$ . The red and blue dash vertical lines indicate equilibrium positions of  $\text{Hf}_2\text{MnC}_2\text{O}_2/\text{Sc}_2\text{CO}_2\text{-P}\downarrow$  and  $\text{Hf}_2\text{MnC}_2\text{O}_2/\text{Sc}_2\text{CO}_2\text{-P}\uparrow$ , respectively.
